# Supplementary material for: Phenomics for photosynthesis, growth and reflectance in Arabidopsis thaliana reveals circadian and long-term fluctuations in heritability
Source: PubMed Central journal article supplement (PMC4754911; doi:10.1186/s13007-016-0113-y), 2016-02-15
Supplement: 13007_2016_113_MOESM7_ESM.pdf [file 13007_2016_113_MOESM7_ESM.pdf]

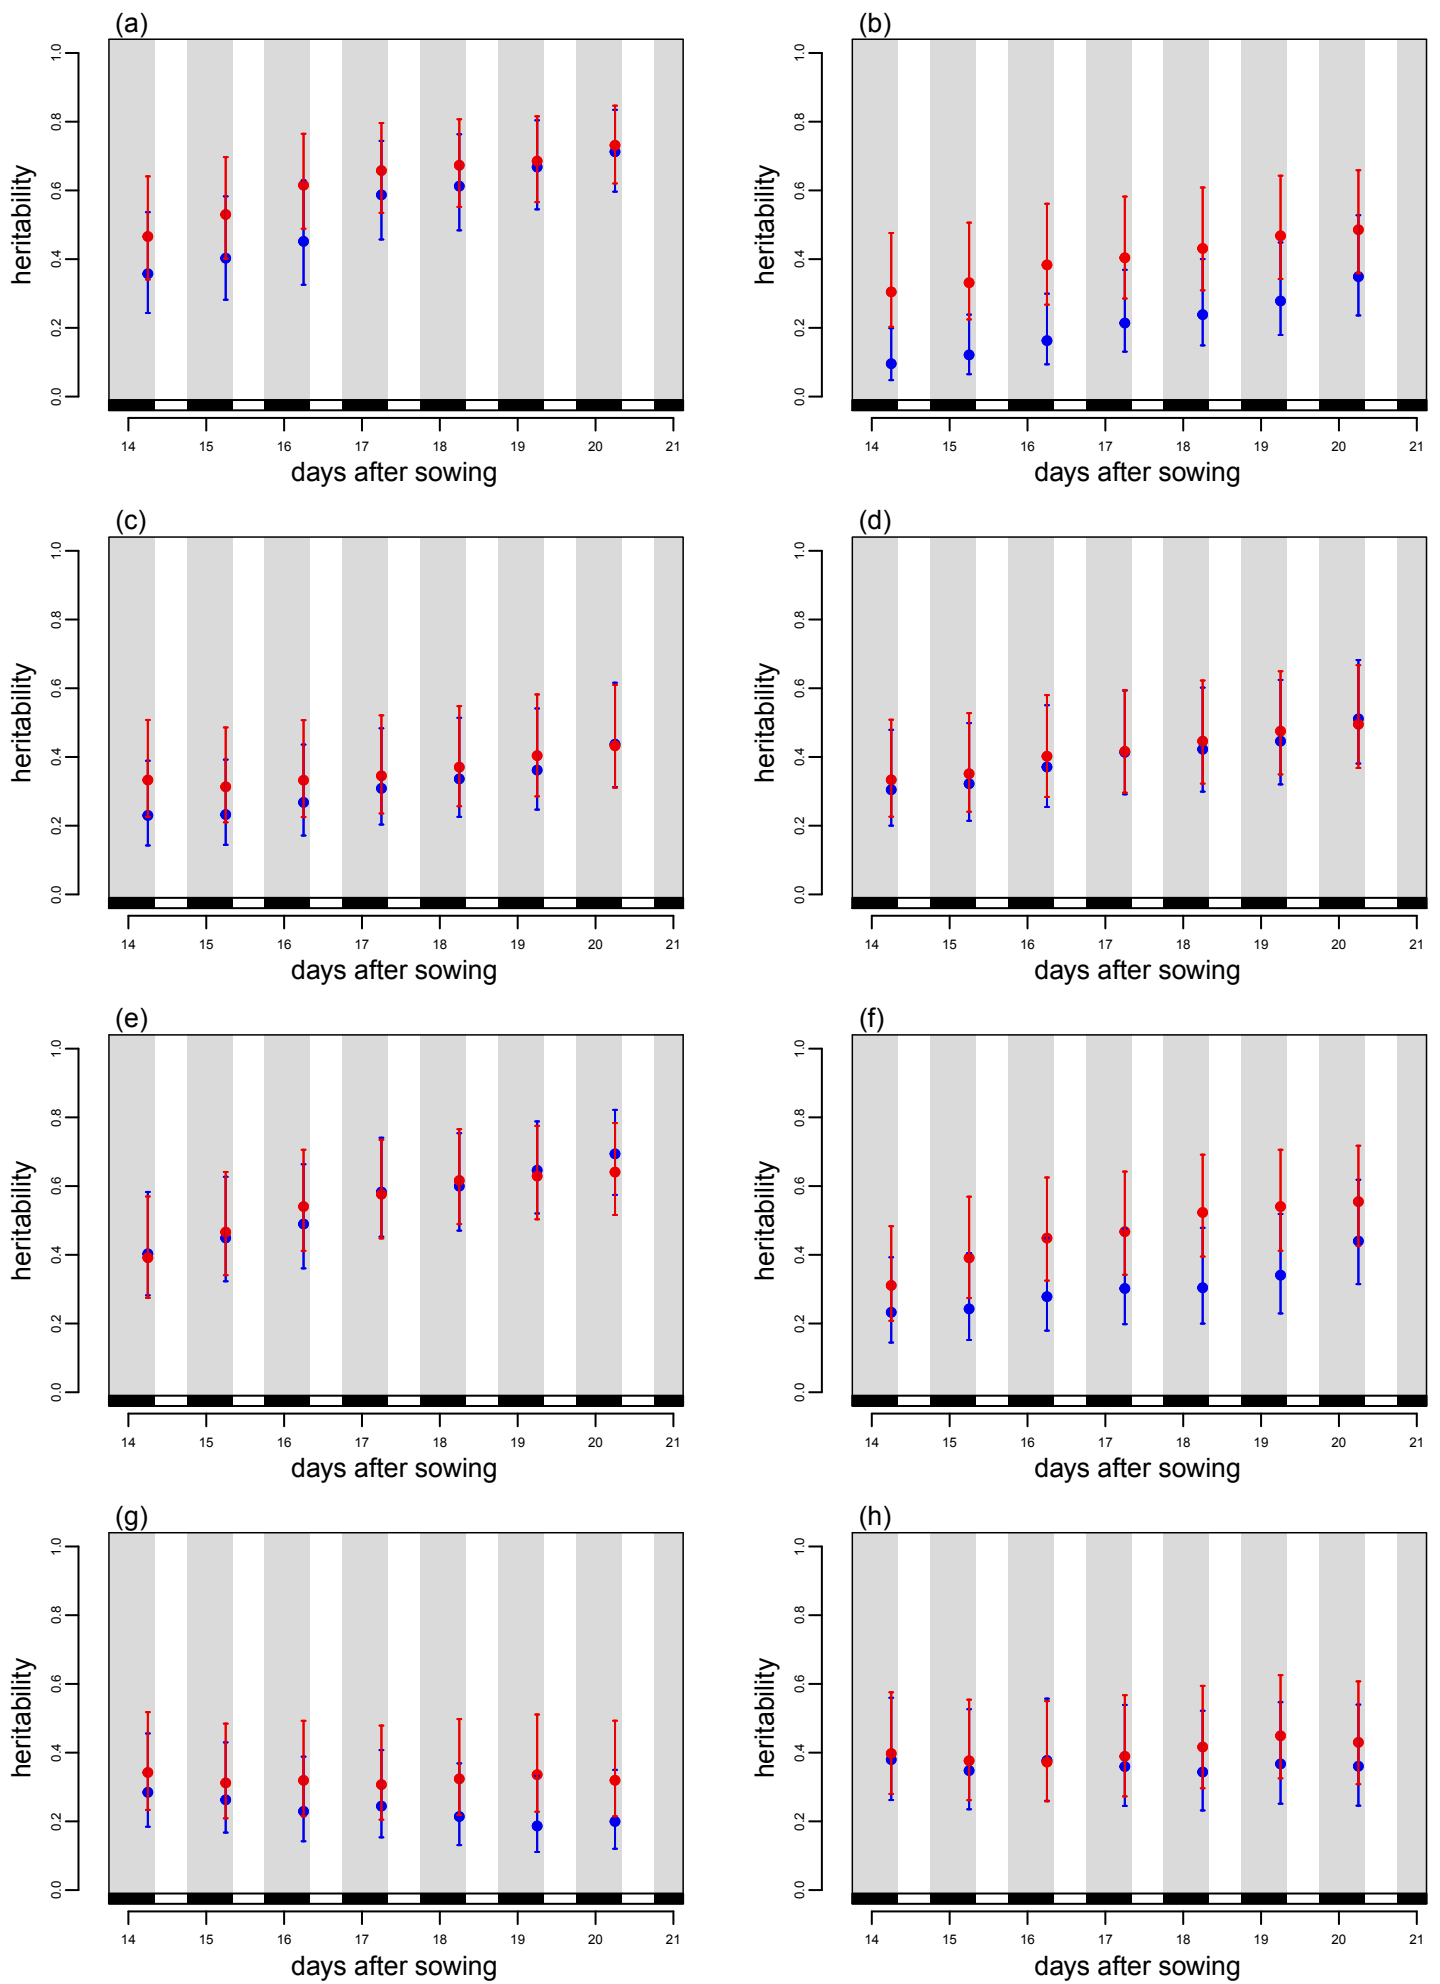

Figure S4. Time course of Heritability for spectral reflectance at eight wavelengths.

(a) 480nm, (b) 532nm, (c) 550nm, (d) 570nm, (e) 660nm, (f) 700nm, (g) 750nm, and (h) 790nm.

200  $\mu\text{mol m}^{-2} \text{s}^{-1}$  (blue) and 550  $\mu\text{mol m}^{-2} \text{s}^{-1}$  (red), white and grey bars indicate the day night cycle.

Error bars are 95% confidence intervals.
