# Supplementary material for: Phenomics for photosynthesis, growth and reflectance in Arabidopsis thaliana reveals circadian and long-term fluctuations in heritability
Source: PubMed Central journal article supplement (PMC4754911; doi:10.1186/s13007-016-0113-y), 2016-02-15
Supplement: 13007_2016_113_MOESM8_ESM.pdf [file 13007_2016_113_MOESM8_ESM.pdf]

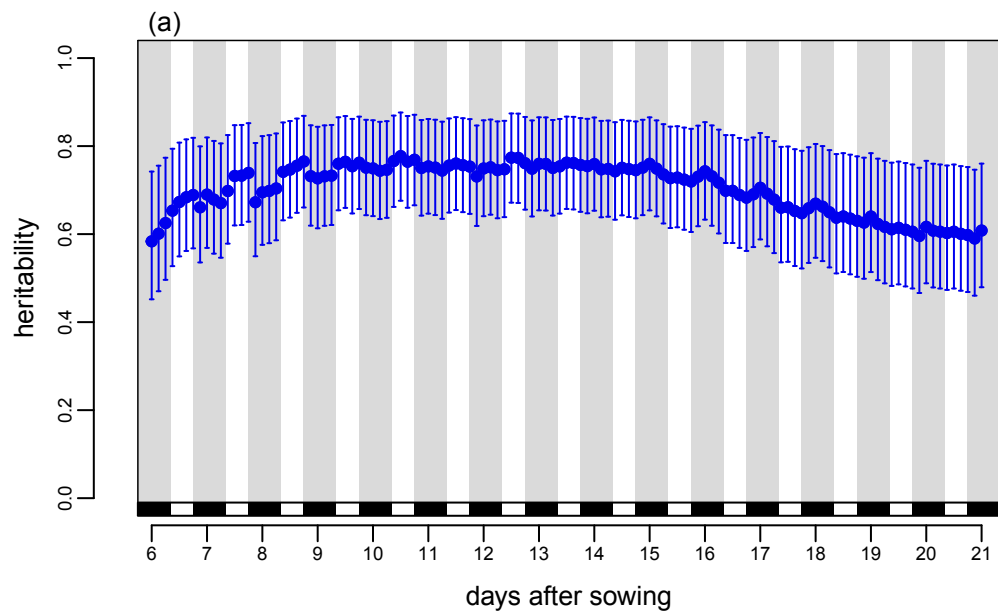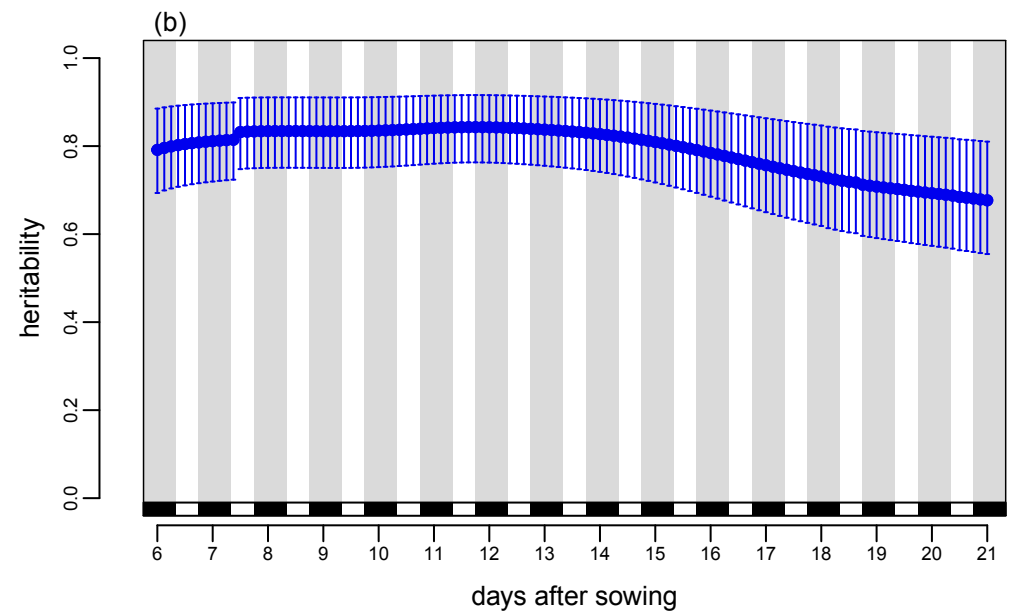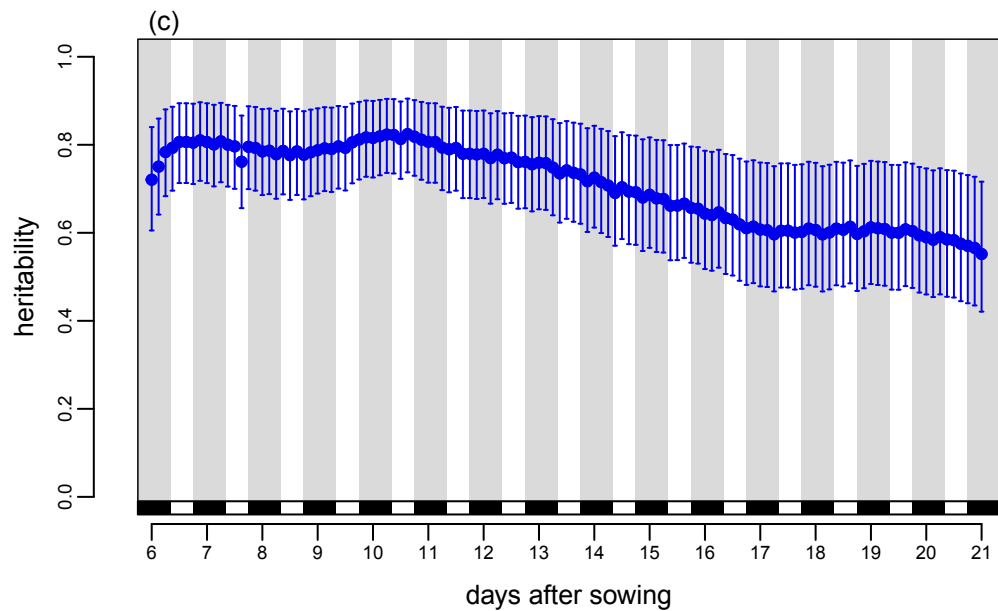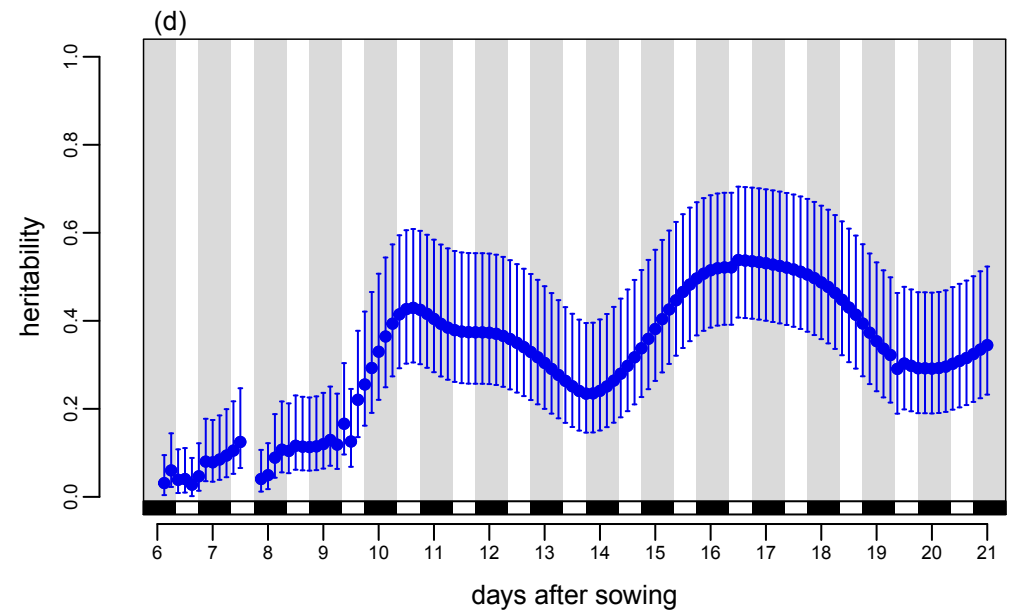

Figure S5. Time course of heritability of growth curve parameters for plants grown at  $200 \mu\text{mol m}^{-2} \text{s}^{-1}$  light intensity.

(a) Projected leaf area (PLA) from near infra-red (NIR) measurements. (b) Data from (a) fitted to a curve. (c) The empirical slope of the growth curve and (d) the relative growth rate. White and grey bars indicate the day night cycle. Error bars are 95% confidence intervals.
